# Supplementary material for: A novel fatty-acid metabolism-based classification for triple negative breast cancer
Source: Aging (Albany NY). 2023 Feb 25;15(4):1177–98. doi: 10.18632/aging.204552 (PMC10008496; doi:10.18632/aging.204552)
Supplement: Supplementary Table 3 [file aging-15-204552-s003.xlsx]

## Sheet: Sheet1
Supplementary Table 3. The potential FAM-related genes across three FAM clusters in METABRIC-TNBC samples.
NMF clustering analysis			DEGs in different NMF clusters			univariate-Cox analysis for DEGs			lasso analysis for DEGs
sample	group		gene （P<0.01）			Tag			Gene
MB-0062	C2		DCAF4			CD52			PLCL2
MB-0100	C1		RASGEF1A			WAS			DCAF4
MB-0115	C1		LOC100240735			SH2D3C			CXCL13
MB-0149	C1		LCP1			WIPF2			DLL3
MB-0157	C3		TRAF1			TMEM79			RASGEF1A
MB-0163	C1		IL21R			RASAL3			SH2D1A
MB-0164	C3		VCAM1			HLA-DMA			FBP1
MB-0174	C2		FCHSD2			TNFRSF13B			IL18RAP
MB-0191	C1		PPM1M			PLCL2
MB-0200	C1		HLA-DMA			DCAF4
MB-0206	C1		ARHGAP9			LTA
MB-0238	C2		LRMP			CD3G
MB-0269	C2		RASAL3			CXCL13
MB-0303	C2		IL18BP			CD27
MB-0316	C2		ZBED2			AIM2
MB-0318	C1		LAT2			RFTN1
MB-0350	C1		RFTN1			HCLS1
MB-0354	C3		LTB			PTPRCAP
MB-0372	C2		DEF6			C1orf228
MB-0396	C1		FGD2			MYH6
MB-0400	C1		ELMO1			CBX7
MB-0401	C3		TNFRSF1B			DEF6
MB-0414	C1		LPXN			CD3D
MB-0420	C1		ST3GAL2			AMICA1
MB-0424	C2		O1/O11 and JK2			FCRL5
MB-0446	C3		PARVG			ARHGAP15
MB-0464	C1		TNFRSF14			GVIN1
MB-0476	C2		PSTPIP1			CD3E
MB-0481	C3		WDR16			PITPNM2
MB-0494	C1		FERMT3			APBB1IP
MB-0516	C2		HLA-DMB			GBP2
MB-0525	C1		TNIP1			XRN1
MB-0581	C1		CHKB			C5orf20
MB-0582	C1		VAV1			PSMB10
MB-0588	C2		LCNL1			CD48
MB-0608	C2		PPP1R16B			B4GALT5
MB-0613	C1		CARD11			ICOS
MB-0627	C2		FGR			CYSLTR1
MB-0639	C1		P2RY8			IL18BP
MB-0658	C1		PRKCB			LPXN
MB-0659	C1		PAG1			GZMH
MB-0664	C1		PDCD1			HLA-DOA
MB-0869	C2		PACAP			TNFRSF1B
MB-0874	C1		SASH3			CYTIP
MB-0901	C1		IFFO1			AKNA
MB-0906	C3		ZNF831			VCAM1
MB-2718	C2		PITPNM2			LAT2
MB-2724	C3		PSMB10			TCRVB
MB-2754	C3		PTPN6			BTN3A1
MB-2827	C2		GVIN1			CD8A
MB-2833	C2		ICAM3			LY9
MB-2842	C3		TNF			NCF1C
MB-2846	C3		APOBEC3C			LYL1
MB-2849	C1		ARMC10			NAPSB
MB-2850	C2		WAS			GPCPD1
MB-2857	C2		HLA-DOA			S1PR4
MB-2904	C2		TMEM168			MYO1G
MB-2912	C3		IL10RA			GMFG
MB-2917	C1		RASSF5			GZMA
MB-2957	C1		DENND1C			TRAF3IP3
MB-2993	C2		GMFG			PAG1
MB-3001	C1		IGSF6			PREX1
MB-3014	C3		CYTIP			APOC1
MB-3046	C1		LAT			CASP4
MB-3057	C1		ACAP1			ARHGAP25
MB-3058	C3		RSPO3			IGSF6
MB-3062	C3		AMICA1			ZBED2
MB-3063	C1		STARD5			CD79A
MB-3067	C1		MYO1G			FAM113B
MB-3153	C1		PTK2B			DLL3
MB-3165	C1		CD3G			CD2
MB-3211	C3		ARHGAP15			PCSK1N
MB-3218	C1		CD4			SLC15A3
MB-3271	C2		CD3E			CTSZ
MB-3277	C3		CD6			SLA2
MB-3292	C2		GGA2			CXCR3
MB-3297	C1		HCLS1			ARHGAP30
MB-3367	C1		DPEP2			IL10RA
MB-3383	C1		SP140			MAP4K1
MB-3395	C1		CD3D			MEI1
MB-3396	C3		MAP4K1			LOC90925
MB-3453	C3		SPI1			SASH3
MB-3476	C2		PYHIN1			ZAP70
MB-3500	C2		LY9			AK123101
MB-3502	C2		ARHGEF5			GIMAP4
MB-3567	C2		GPSM3			HLA-DMB
MB-3702	C2		SEL1L			TBC1D10C
MB-3706	C1		ITGAX			IL16
MB-3752	C3		IGKC			PRKCB
MB-4024	C2		HTRA4			FGD3
MB-4146	C3		GZMH			RASGEF1A
MB-4254	C2		PTPRCAP			LRRC25
MB-4303	C2		PLCB2			DYM
MB-4332	C3		LYL1			HSPBP1
MB-4407	C3		KEL			LAPTM5
MB-4408	C3		ITK			LOC100240735
MB-4416	C2		FCRH3			CA393467
MB-4417	C3		RGL4			SLAMF1
MB-4621	C3		CD19			RASSF5
MB-4622	C2		XRN1			SLA
MB-4660	C3		ARHGAP25			GPR132
MB-4679	C2		ALPK2			SH2D1A
MB-4696	C1		CXCL13			FBP1
MB-4707	C2		TCRVB			FERMT3
MB-4712	C3		SKAP1			PARVG
MB-4714	C2		ARRDC5			DYNLL1
MB-4715	C2		CTLA4			BATF
MB-4717	C1		CD27			IRF1
MB-4732	C3		STAU1			CD247
MB-4733	C3		DVL1			CD7
MB-4757	C3		RIOK1			LCP1
MB-4758	C2		ARHGAP30			PNMA1
MB-4769	C1		TNFSF13			CTLA4
MB-4792	C3		TOX2			GPSM3
MB-4793	C1		DKFZp666C094			IL18RAP
MB-4865	C1		SLA			TYW1
MB-4881	C2		PHF10			RASGRP2
MB-4888	C2		PLCL2			CD6
MB-4893	C2		PRR5L			IFFO1
MB-4911	C2		CD79A			ATP6V1B2
MB-4931	C2		CDK16			FGR
MB-4938	C1		PEX7			RGL4
MB-4945	C3		U43604			VAV1
MB-4974	C2		IRF1			PRDM8
MB-5057	C1		INPP5D			P2RY8
MB-5058	C2		SENP6			PPM1M
MB-5065	C2		S1PR4			LRMP
MB-5070	C2		POU2F2			EXD2
MB-5100	C1		CD48			CD19
MB-5102	C1		LTA			ACAP1
MB-5115	C1		FAM111A			STAT4
MB-5126	C2		EXD2			EOMES
MB-5135	C2		FAM159A			PSTPIP1
MB-5138	C1		IL2RG			PYHIN1
MB-5155	C1		IDO2			ASPHD2
MB-5173	C1		C5orf20			ITK
MB-5205	C3		CD8A			ADRB2
MB-5208	C3		TNFRSF9			METTL11A
MB-5209	C3		IL16			ZNF683
MB-5223	C1		BTN3A1
MB-5225	C3		STAT4
MB-5232	C1		CD7
MB-5236	C2		TRPV2
MB-5258	C2		FKBP11
MB-5295	C2		SIPA1
MB-5298	C1		ARHGAP4
MB-5299	C3		NAPOR-1
MB-5323	C3		MAL
MB-5335	C1		DHX15
MB-5346	C3		MDN1
MB-5348	C2		PTPN7
MB-5378	C1		PARM1
MB-5390	C1		CCR7
MB-5392	C2		ITGB7
MB-5421	C2		NCF1C
MB-5427	C1		CXCR3
MB-5440	C2		TNFRSF4
MB-5450	C1		KIAA1737
MB-5465	C3		POLR2J
MB-5482	C2		TMEM138
MB-5526	C1		MEF2C
MB-5529	C1		CD2
MB-5531	C1		CD200R1
MB-5547	C3		IFNA7
MB-5548	C3		MYO1F
MB-5551	C2		ZAP70
MB-5560	C2		MEI1
MB-5566	C3		DB336481
MB-5572	C2		SLC15A3
MB-5602	C3		AGXT2L2
MB-5616	C1		UBAP2
MB-5624	C2		CD247
MB-5633	C3		SLAMF1
MB-5634	C3		CORO1A
MB-5651	C3		HCST
MB-5655	C1		FAM116B
MB-6052	C2		WRNIP1
MB-6055	C2		ATP6V1B2
MB-6058	C1		FOXO1
MB-6062	C2		RENBP
MB-6098	C3		DYM
MB-6143	C2		ICOS
MB-6178	C2		ABI3
MB-6223	C3		C15orf61
MB-6242	C2		TXNDC11
MB-6245	C2		C2
MB-6248	C2		GIMAP5
MB-6251	C1		CSE1L
MB-6272	C1		NKG7
MB-6280	C1		GSDMD
MB-6336	C1		EPN2
MB-7008	C3		CYP2S1
MB-7009	C1		POLD4
MB-7012	C1		AKNA
MB-7017	C2		KBTBD8
MB-7023	C2		AK123101
MB-7025	C2		GPR132
MB-7031	C1		KIAA0748
MB-7036	C2		DHX9
MB-7038	C1		IL18RAP
MB-7049	C1		MRS2
MB-7052	C3		PIK3IP1
MB-7055	C1		DYNLL1
MB-7057	C1		LAPTM4B
MB-7078	C1		TBC1D10C
MB-7081	C1		STK10
MB-7087	C1		FAM113B
MB-7090	C1		EAF2
MB-7114	C1		R3HCC1
MB-7119	C2		DTYMK
MB-7121	C3		SH2D1A
MB-7145	C1		VANGL1
MB-7154	C2		TUBB
MB-7155	C1		ZNF567
MB-7158	C2		SELPLG
MB-7159	C3		CXCR5
MB-7165	C1		MGC27345
MB-7205	C1		GZMA
MB-7208	C1		CDC123
MB-7258	C1		HLA-DQB1
			AP1S1
			FGD3
			PSORS1C1
			FBXL2
			CDK8
			PNOC
			IGSF9
			EFHD2
			NR1H3
			COX7A2
			POU2AF1
			ORC5
			OAT
			METTL11A
			IL12RB1
			GEN1
			POFUT1
			SNX11
			DNAJC11
			DYNC1I2
			CCL19
			BCCIP
			GBP2
			GNGT2
			CCDC88B
			ZNF683
			XIST
			GNLY
			GIMAP4
			IL4R
			CA443138
			AV700714
			CD5
			C14orf139
			APBB1IP
			TRAF3IP3
			KIF5B
			WDR12
			APOC1
			TRIM68
			CTSW
			PNMA1
			ZNF77
			LOC643837
			PSMB5
			MOBKL2A
			APEX1
			LOC643733
			GIMAP7
			FAM83D
			HSPBP1
			FUT11
			EOMES
			DOK2
			HDAC2
			DDX21
			VASH1
			PPIL6
			KATNA1
			GRAP
			SERPINF1
			TUBA1C
			FAM46C
			AIM2
			LYPLA2
			EXOC1
			SDHC
			NBPF3
			GPR18
			PHF15
			FCAR
			DIABLO
			NFYA
			ATP5C1
			CR626998
			EML3
			TRPS1
			WDFY3
			ARHGDIB
			RUNX3
			MASTL
			PANK1
			FBP1
			OCLN
			AW085986
			TRIM52
			IGFLR1
			C14orf156
			ZNF283
			MICA
			FAM153A
			GTF2E1
			GART
			ATP5A1
			LOC90925
			AK056817
			BATF
			2022-09-06
			TNFSF14
			C15orf44
			KLF6
			TYMP
			ISG20L2
			TYW1
			FCRL5
			STMN1
			NAPSB
			SYVN1
			EPC1
			ETS1
			GAS7
			CKS1B
			CYSLTR1
			SLC4A7
			KLHL3
			NPSR1
			PGM3
			RIPK3
			NAPSA
			ASPHD2
			CD79B
			MAD2L1
			DNAH1
			RAB37
			MYO6
			SH2D3C
			YME1L1
			TLR9
			ZNF239
			ZC3HAV1L
			C1orf228
			TCIRG1
			FICD
			POC1A
			HMHA1
			TGIF1
			ZNF286A
			PRDM8
			RNASE10
			CYFIP2
			NCAPG2
			NME7
			LIME1
			CD28
			BX088829
			CPNE5
			AK021903
			NUP153
			SLC25A24
			ZDHHC5
			KIAA0513
			TESC
			RUVBL1
			LOC220930
			2022-09-01
			DAP3
			DERL3
			FAM30A
			C15orf23
			NFKBIZ
			SETDB2
			GTF2I
			AK129699
			DCAF6
			CD52
			GLRX3
			POLR1A
			B3GALT4
			NCKAP1L
			WIPF2
			C5orf22
			SLMO2
			CLNK
			AKT2
			CLDND2
			PTPN22
			NUDT18
			FAM129C
			PXMP2
			CR936671
			SLC1A4
			LOC728407
			INADL
			CYBASC3
			PIGS
			C11orf2
			OSGEPL1
			GTPBP4
			UBE2E3
			RACGAP1
			BRMS1L
			PIK3CD
			NET1
			PATL2
			PTGDS
			GUCY1B3
			LAPTM5
			FBXO30
			CASP4
			KIAA0020
			ADH5
			GTF2IP1
			RASGRP2
			C1orf51
			C20orf112
			ATG4B
			BE549690
			SH3TC1
			CCDC138
			VPS35
			ESRP1
			CCL25
			WASL
			PCSK1N
			TNFRSF13B
			RHOG
			SIRPG
			CCT7
			AP1B1
			LRCH4
			B4GALT5
			SPATA5L1
			IKBKE
			TMEM209
			HIST1H2AC
			NUP205
			XIRP1
			SOCS6
			MECOM
			CD22
			BLK
			ACP1
			JMJD1C
			TADA1
			PLEKHO2
			PRAM1
			SMAP2
			CBX7
			ABCB8
			DAB2
			SAPS2
			GTSF1L
			POLR2D
			C3orf23
			PRKAR1B
			SCYL1
			ZNF627
			TXN
			SFT2D2
			ERAP2
			NDUFB2
			LRPPRC
			SMS
			RNF166
			MLLT10
			SELV
			CTSZ
			KDM5B
			C7orf13
			LPAR1
			EPCAM
			GAB3
			IL1RL2
			DLG3
			THBS3
			TAF1B
			PPAT
			CLIC5
			SDHB
			WISP3
			AK311113
			ZNF671
			RFC3
			DDX1
			RAD51
			ACER3
			BEND3
			MAP3K14
			UCK2
			ZBTB41
			GP1BA
			PAOX
			RRP1B
			PPP1R8
			GPCPD1
			PRR13
			C6orf170
			BX112750
			ALS2CR4
			ANKRD33
			SLA2
			DLL3
			TPST2
			CFP
			DYNLT1
			KIF3C
			TUBB2A
			ADRB2
			RNF113A
			TRIM24
			PGK1
			WDR47
			MRPL9
			TMEM48
			TSPYL2
			SRPRB
			SPNS3
			TNRC6B
			DOK3
			TSC22D1
			APBB3
			RUNDC2B
			CBLN3
			LRRC25
			PREX1
			RHEB
			LCK
			CBX6
			PHF16
			CD40LG
			PAK1IP1
			REST
			LOC100506207
			MYH6
			STAT6
			ZNF143
			GNG8
			IARS2
			IKZF3
			PEX1
			RAE1
			OR14C36
			ST3GAL1
			RAD54B
			TMEM156
			PIGC
			SERF1B
			CTTNBP2NL
			LY6G5C
			CTBP2
			MLLT6
			SIDT2
			RBM28
			DTHD1
			POT1
			ZNF124
			NPEPPS
			IFT81
			HTRA2
			CCT6P3
			LOC146880
			XRCC5
			C15orf57
			SGOL2
			C1orf124
			PHC2
			SUN1
			RABL3
			ZNF410
			CA393467
			FOSL2
			RAB24
			PIGK
			LOC340515
			SLC18A1
			OPN3
			POLR2B
			LGI4
			FAM78A
			CCL21
			TNFRSF13C
			HIVEP1
			ACPT
			UNQ2783
			ZNF425
			ABCF2
			ANKH
			ILF2
			CTSE
			FCER2
			MAN2B1
			TEF
			BC169297
			CTRL
			MAP4K3
			ZNF679
			ARID1A
			AK126122
			P2RX1
			PDE7A
			NAALADL1
			RPF2
			POGK
			TUSC1
			CYorf15B
			TSHZ2
			STAT2
			GPR107
			OBP2A
			TUBA1A
			AMPD1
			COPS5
			C1orf109
			DDX11L2
			HSPA8
			SIL1
			HSPD1
			BC039397
			BX100016
			EIF5A2
			SYPL1
			AV651069
			PSMC4
			NRBF2
			TBP
			FAM185A
			TLK2
			SLC25A42
			VPRBP
			ADSS
			PIGW
			CCM2
			SNX29
			MMAB
			ANXA11
			HINT3
			BM789063
			MAEA
			DSC2
			WDSUB1
			PDIA6
			THNSL1
			MYCBP2
			CETP
			NLN
			LTN1
			CUL2
			CYP4V2
			AI349750
			GTF3C4
			TMEM41A
			C3orf17
			VPS45
			ECD
			TIPRL
			ZIC4
			TXLNG
			TRANK1
			SCAMP1
			GPX3
			TRUB1
			UBASH3A
			IRF2BP2
			HNRNPD
			MECP2
			TNFAIP1
			KLK1
			COQ10A
			TSPAN31
			FAIM3
			UBL7
			SMC3
			C18orf19
			UCP2
			CUTA
			KHDRBS1
			RNF8
			FAM177A1
			DPH2
			EZH2
			ACADM
			DQ893812
			PIGF
			RPGRIP1L
			CBWD1
			SPATA20
			SOX9
			HBP1
			NR1H2
			ANKRD7
			LOC285074
			TAF10
			LOC645676
			AJ312026
			OSBPL7
			TSG101
			PFAAP1
			OLFM2
			DHX40
			AY358241
			FXYD7
			SAP30
			KIF4A
			VDAC1
			CDC40
			PTPN21
			ZSWIM6
			SPRYD3
			IKZF5
			SSBP1
			SRP9
			IFRD2
			WEE1
			TAPBP
			ZNF250
			SMARCC1
			ZNF586
			ACCS
			C2orf47
			CSTF1
			ADORA2A
			RSPO2
			ADAP1
			RAPGEF1
			RARS2
			MVP
			TMEM71
			HPS5
			LMF2
			VAMP1
			SDF2L1
			ACTB
			STAB1
			ARAP1
			GMIP
			HNRNPM
			AJ420430
			STRBP
			TMEM79
			MTHFD1L
			NPAT
			FER
			BLOC1S1-RDH5
			PPP1R3E
			DNHD1
			C1QBP
			ZNF571
			SCAMP2
			INTS12
			METTL18
			TMEM85
			CACYBP
			LMBR1
			ENGASE
			QKI
			RCVRN
			IWS1
			AI699581
			ACVRL1
			FAM107B
			TCF4
			AMD1
			TPM3
			LRRC15
			MGST3
			SMAD4
			MRPL3
			COBLL1
			CASP2
			VPS13C
			CYP1A1
			ANGPTL6
